# Supplementary material for: High-throughput printing of functionally gradient material from self-propagation
Source: Research Square preprint supplement (doi:10.21203/rs.3.rs-6071151/v1), 2025-03-07
Supplement: Supplementary file 1 [file 84df1ada65155be63964a83a.docx]

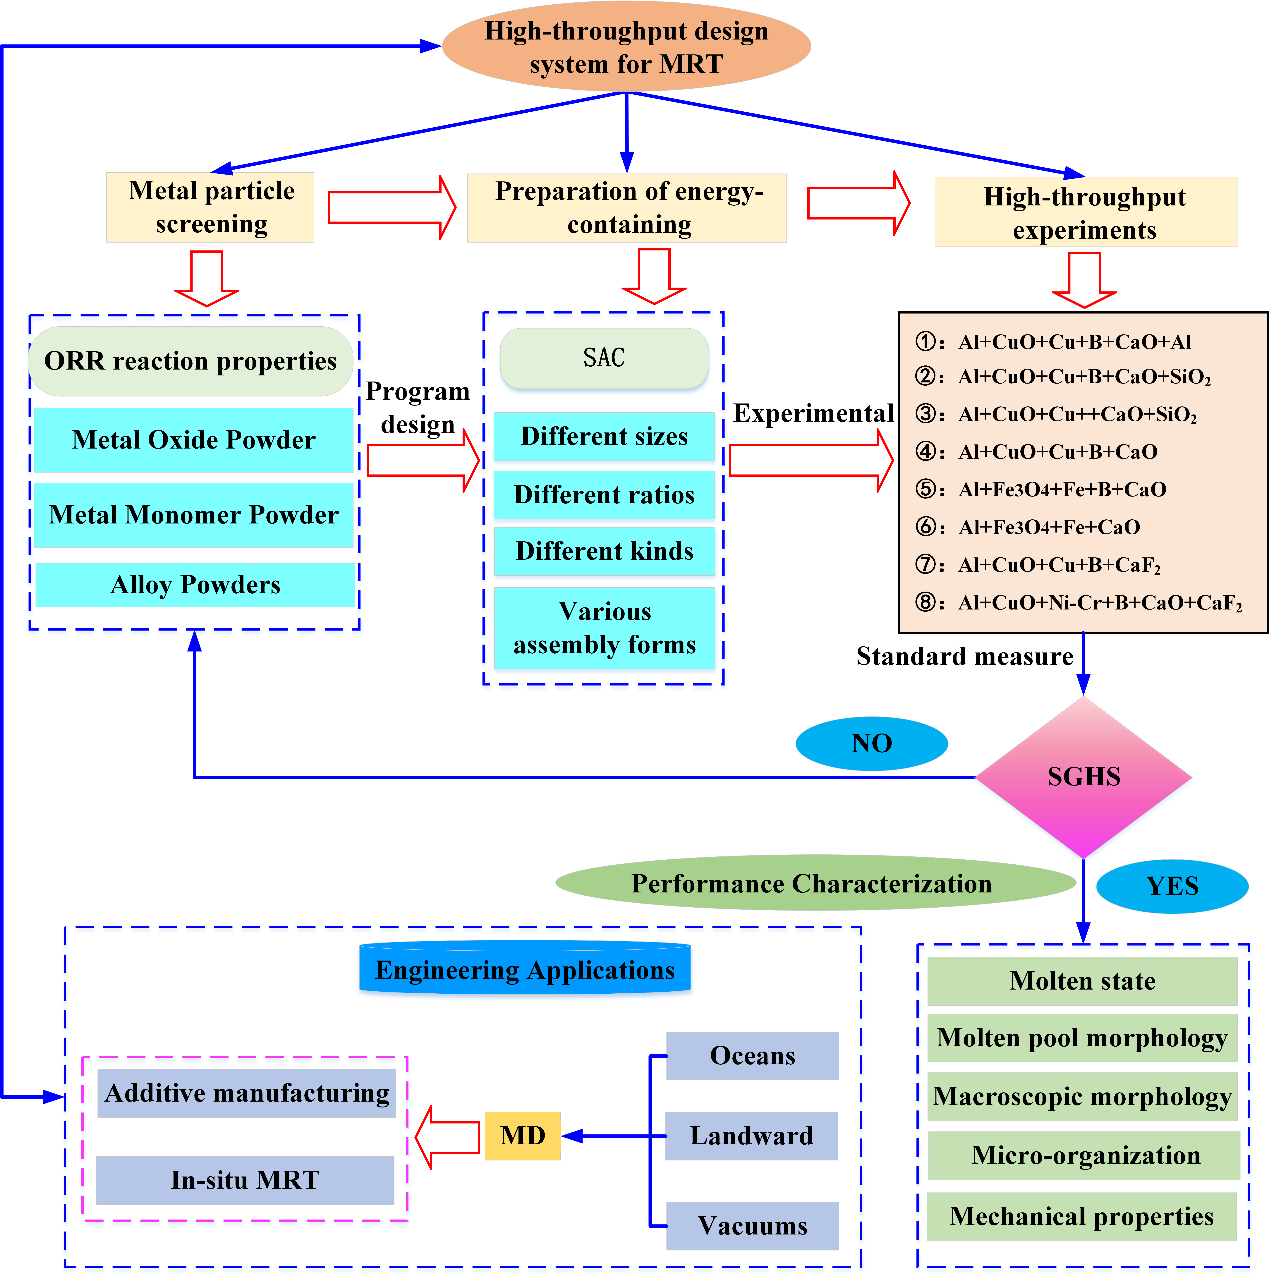


Supplementary Data 1. High-throughput design ideas for metal repair tapes.


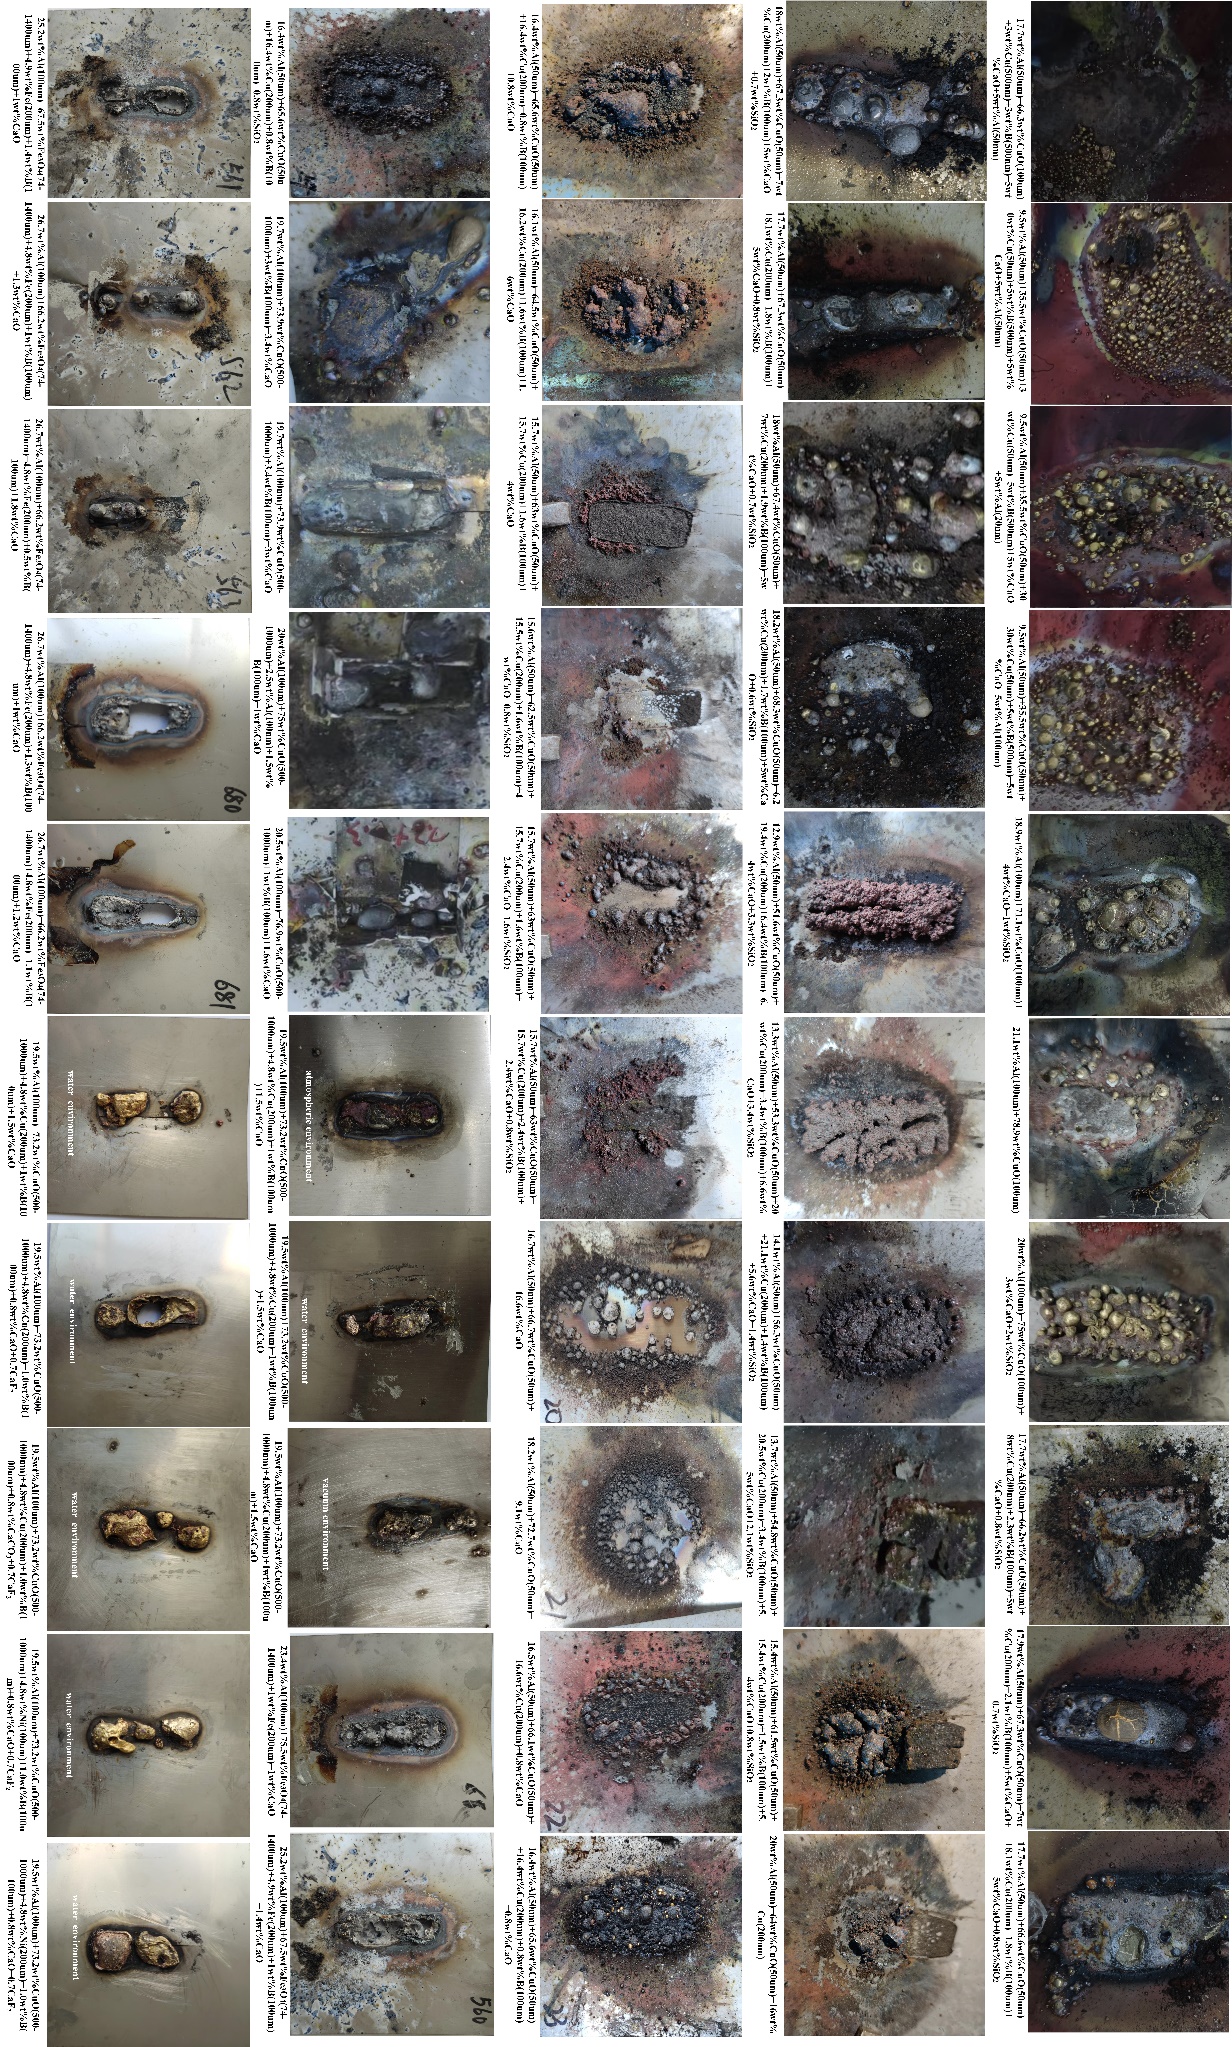


Supplementary Data 2. High-throughput experimental characterization.


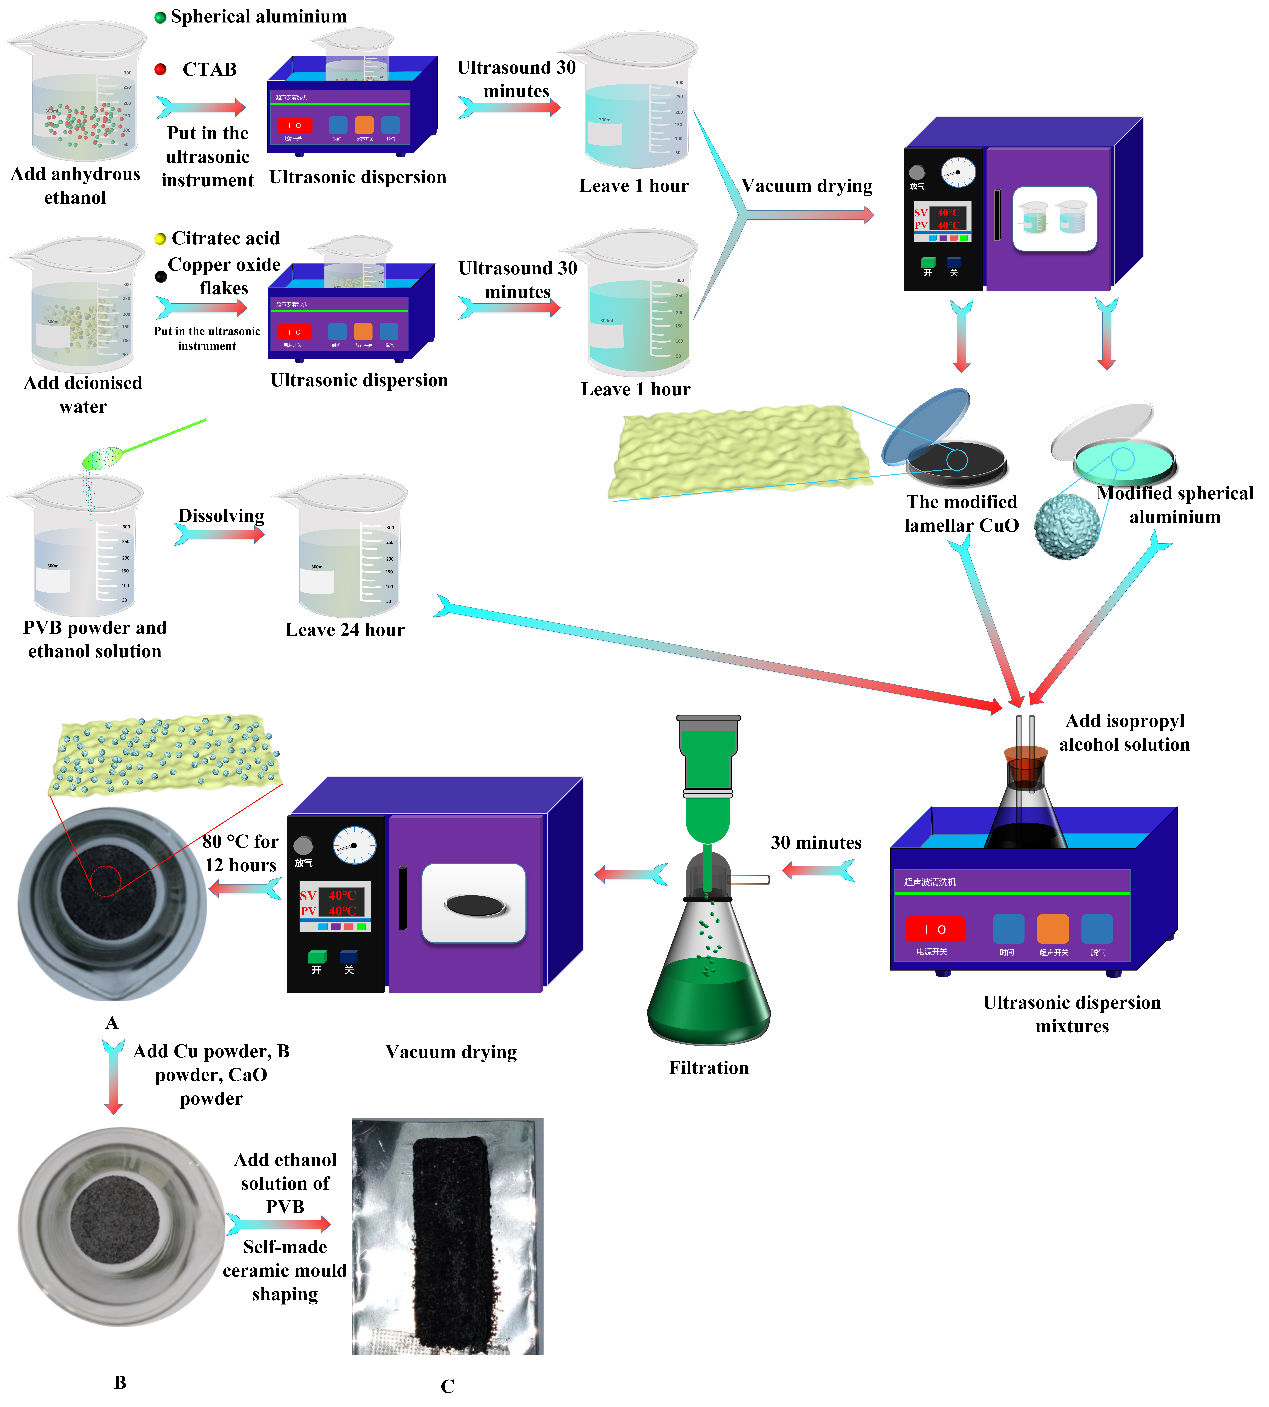


Supplementary Data 3. Flowchart of the modification and self-assembly experiments of the initial feedstock.


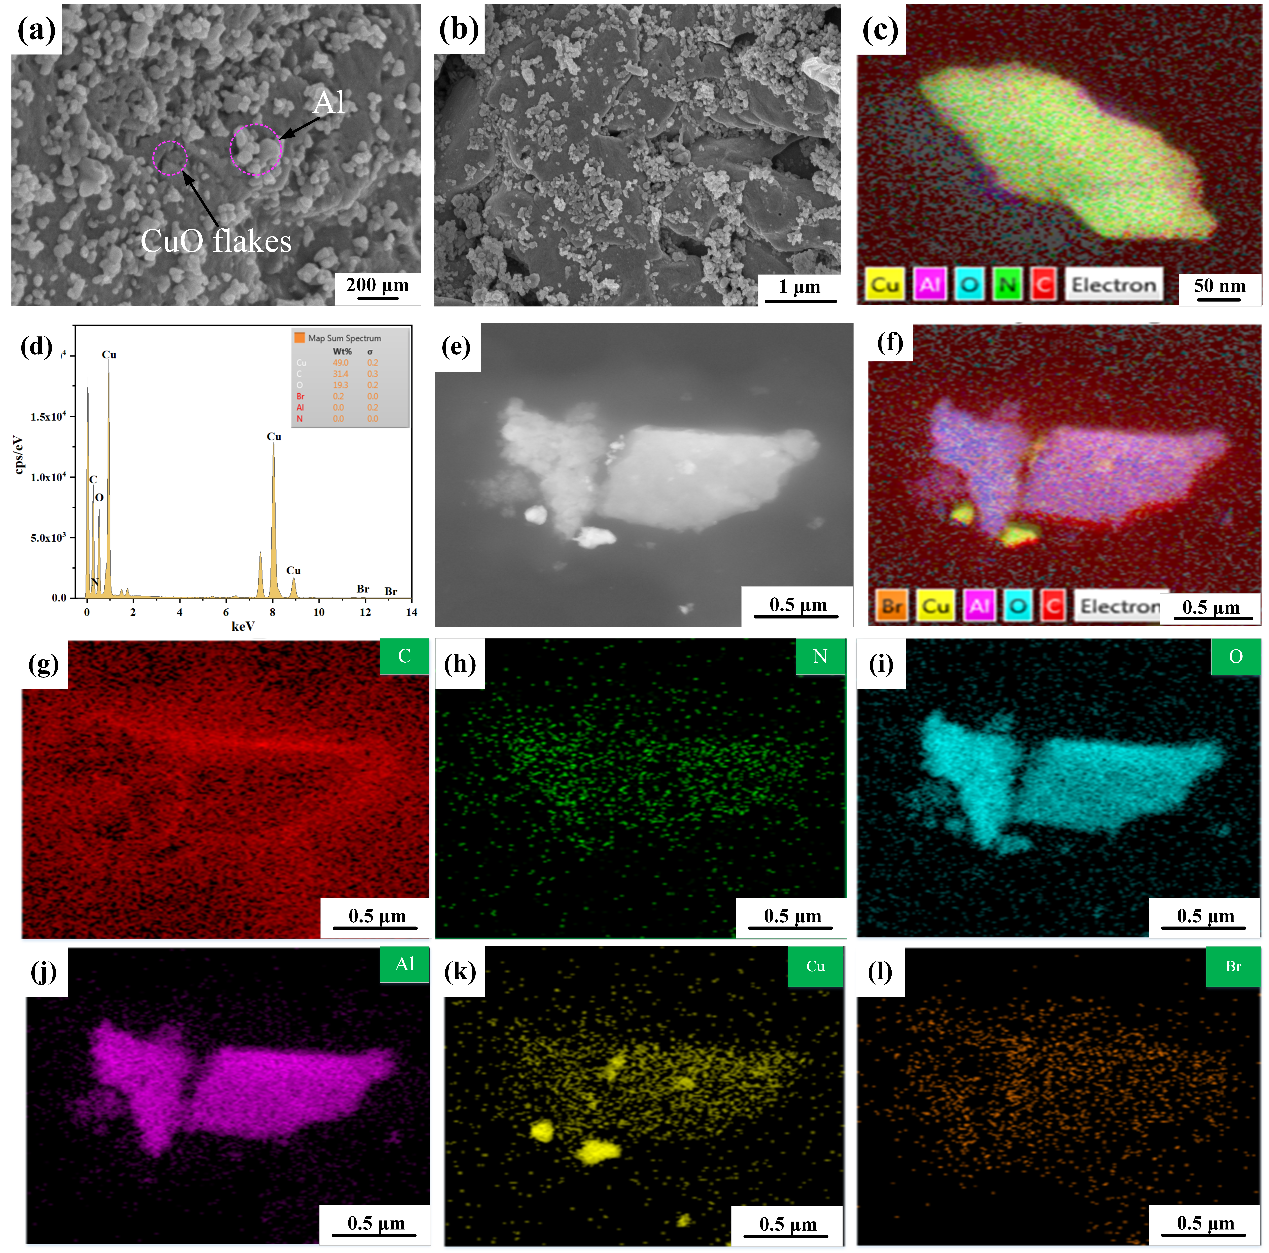


Supplementary Data4. Microscopic morphology of A. (a-b) High-definition SEM morphology at different magnifications, where spherical aluminium can be observed adhering to the CuO sheet.; (c) EDS mapping of full spectra; (d) (d) Elemental energy spectra and variations, (e) TEM map, (f) Full-spectrum map; (g)C, (h)N,(i)O, (j)Al, (k)Cu, (l)Br of refined spectrum.


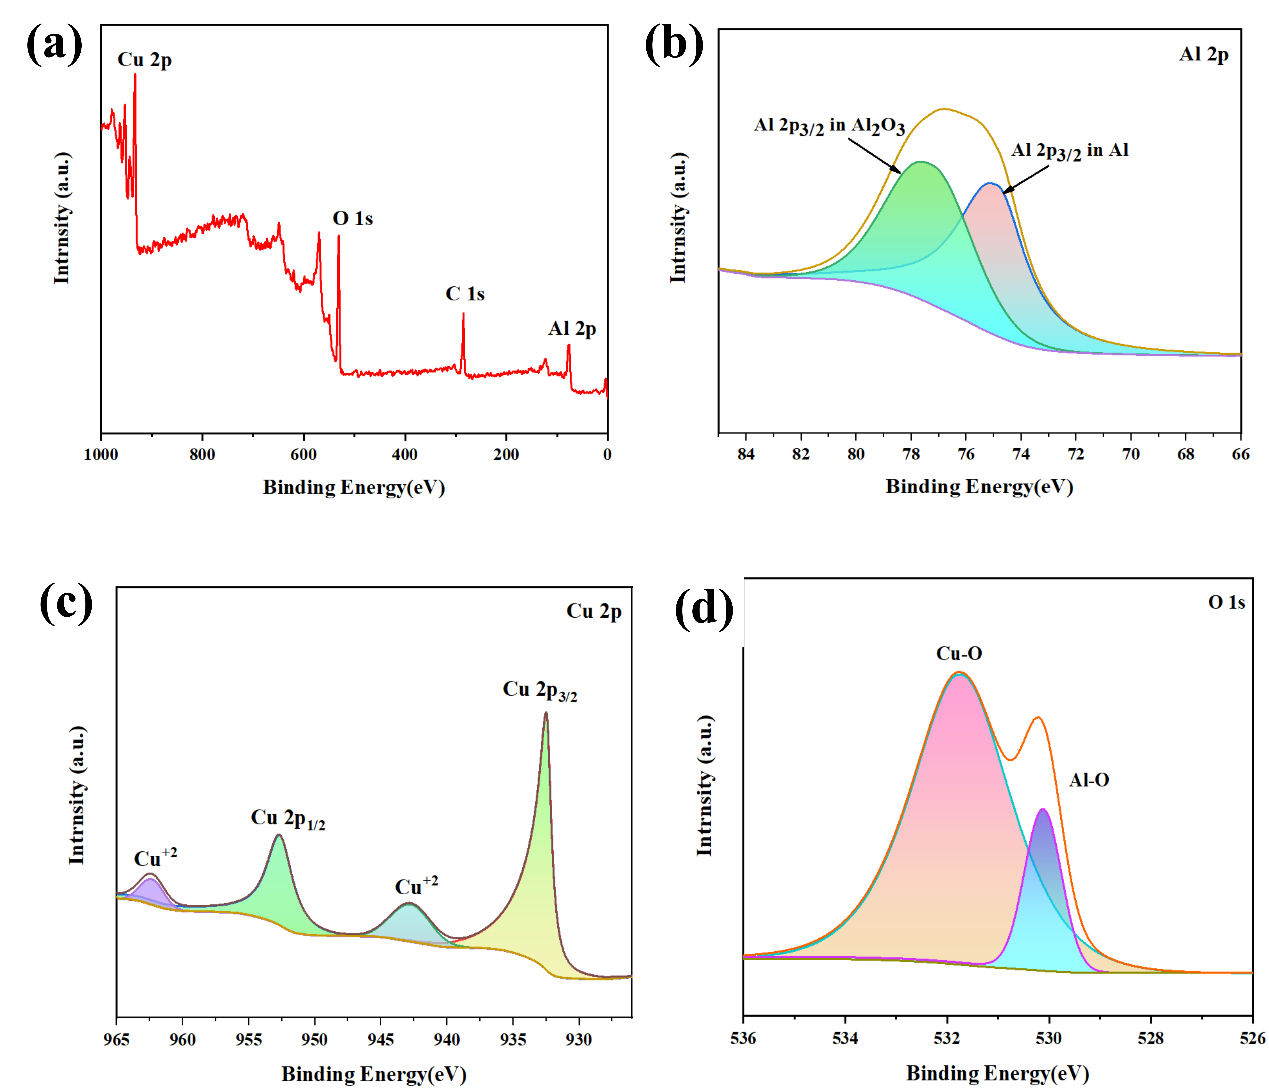


Supplementary Data 5. Characterization of properties during the preparation of energy-containing materials. (a-d) XPS


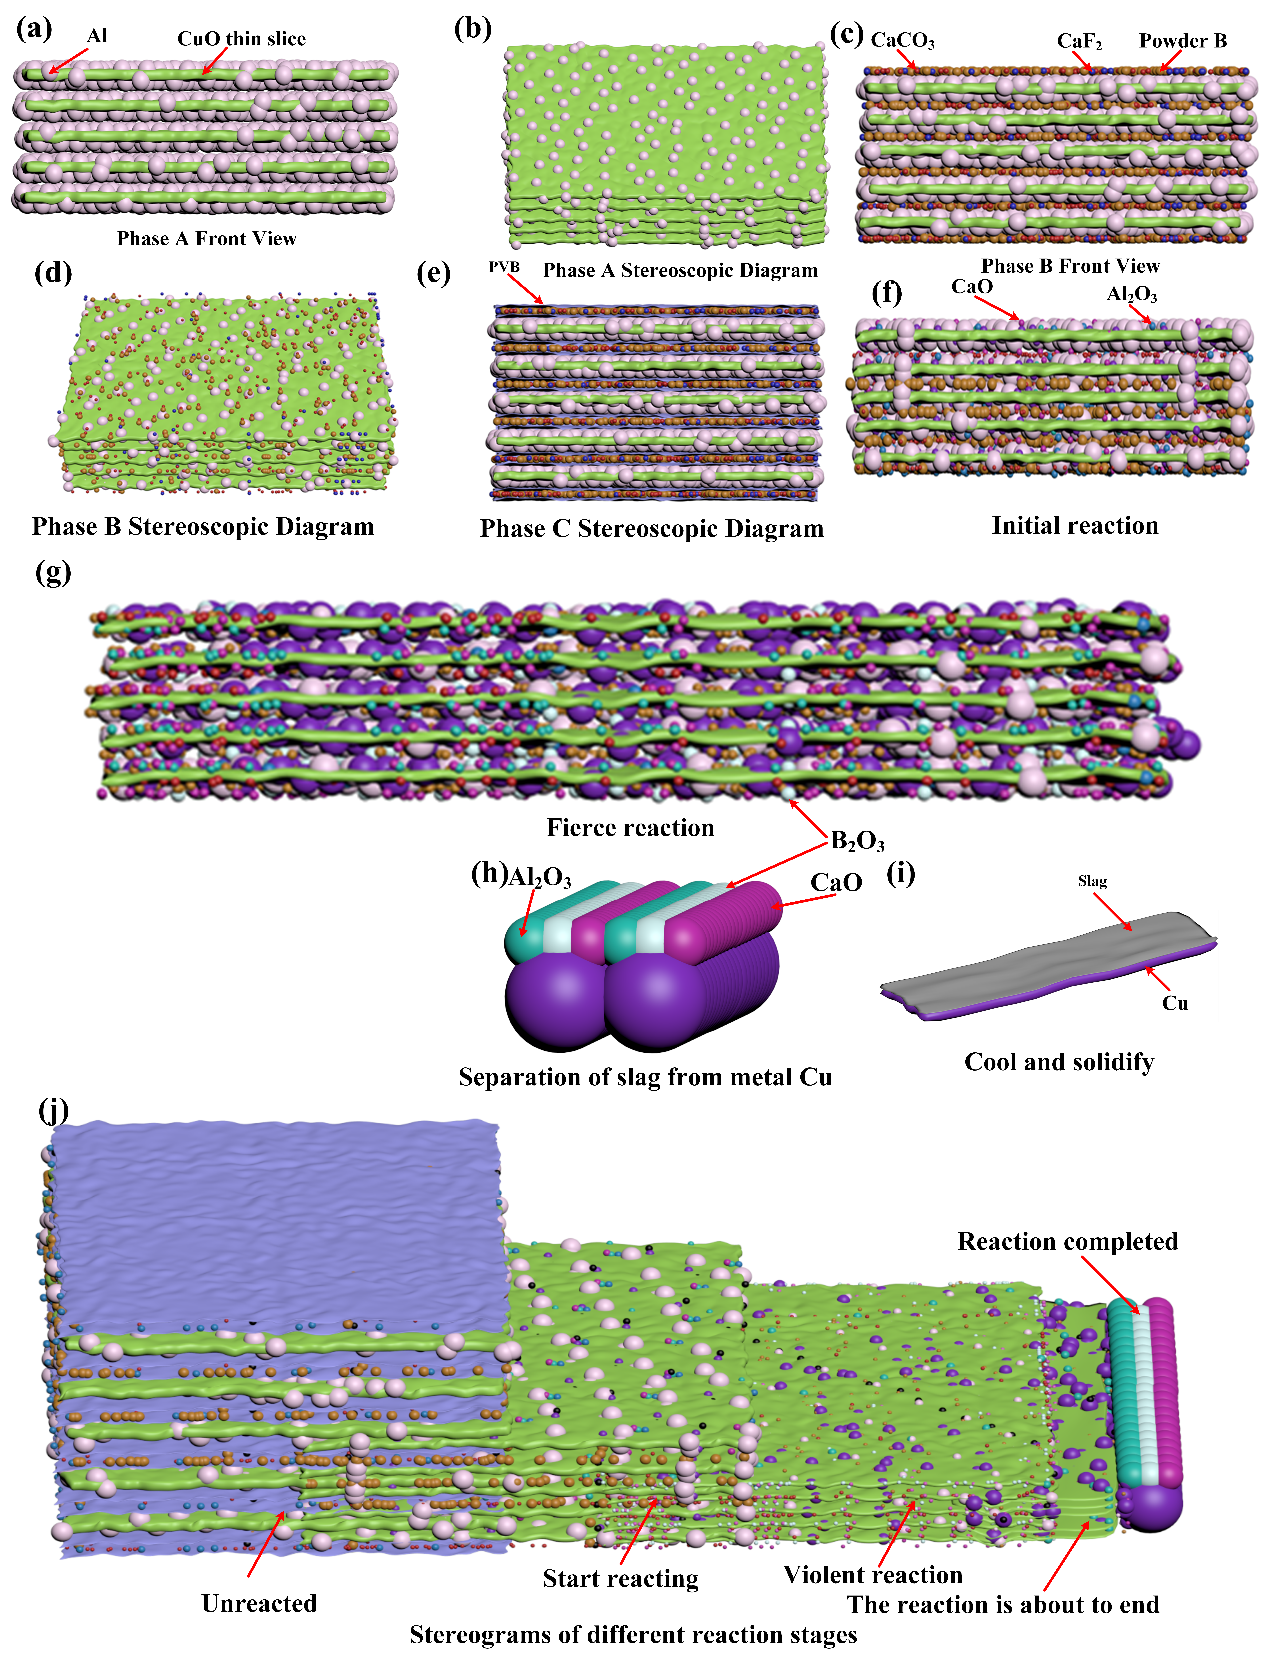


Supplementary Data 6. Physical model diagram of 3DPS. (a) A is formed by modifying and assembling Al with CuO; (b) the top view of A; (c) B is formed by adding CaO, B powder , CaF2 to A; (d) three-dimensional modeling diagram of B; (e) C is obtained after adding PVB; (f) initial start of the aluminum thermal reaction; (g) entering the violent reaction stage; (h) Slag separating from the metal; (i) the morphology of metal and slag formed by the combustion of C; (j) simulation of the different reaction stages of C;


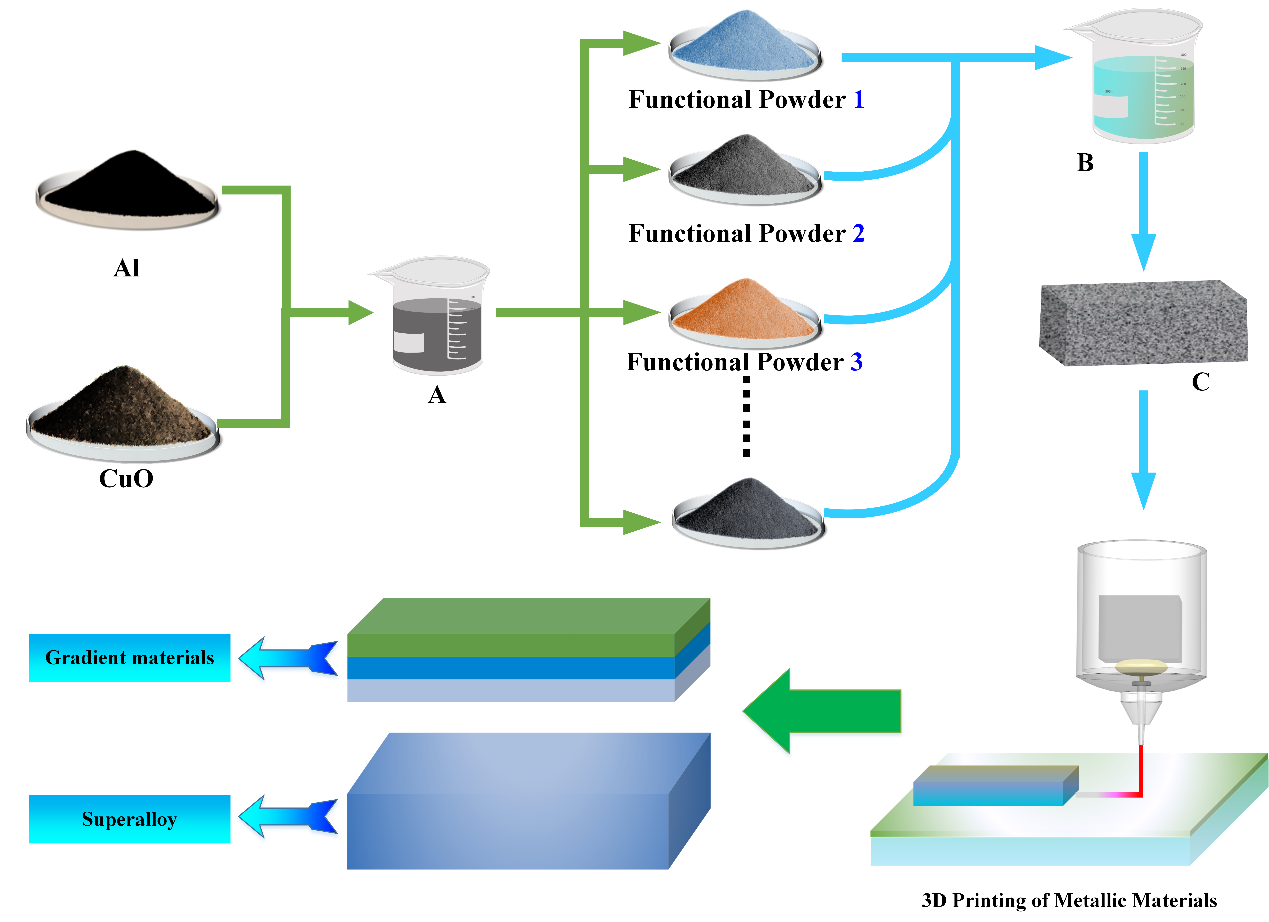


Supplementary Data 7. SPEDT for the preparation of super alloys


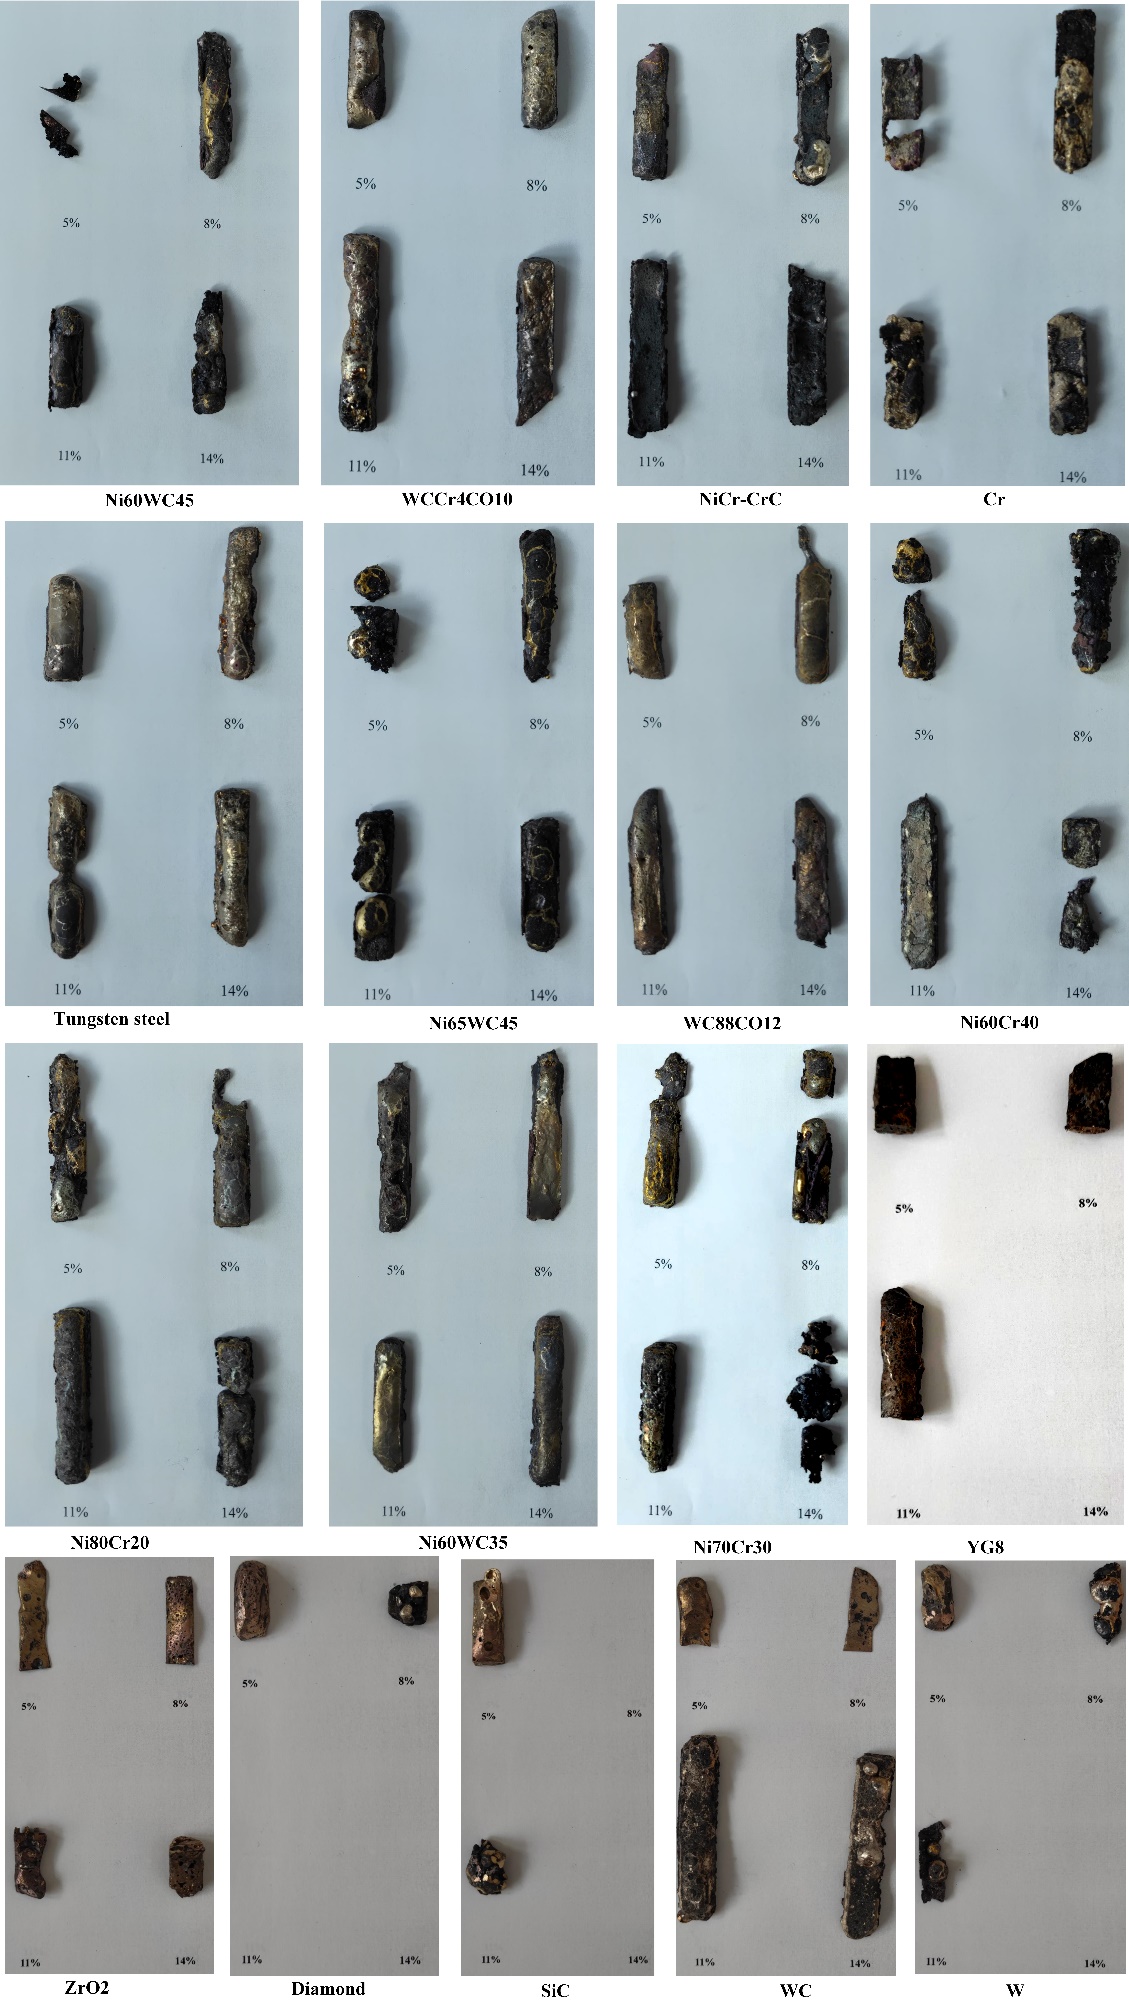


Supplementary Data 8. Morphology of superalloy sample prepared by SPEDT


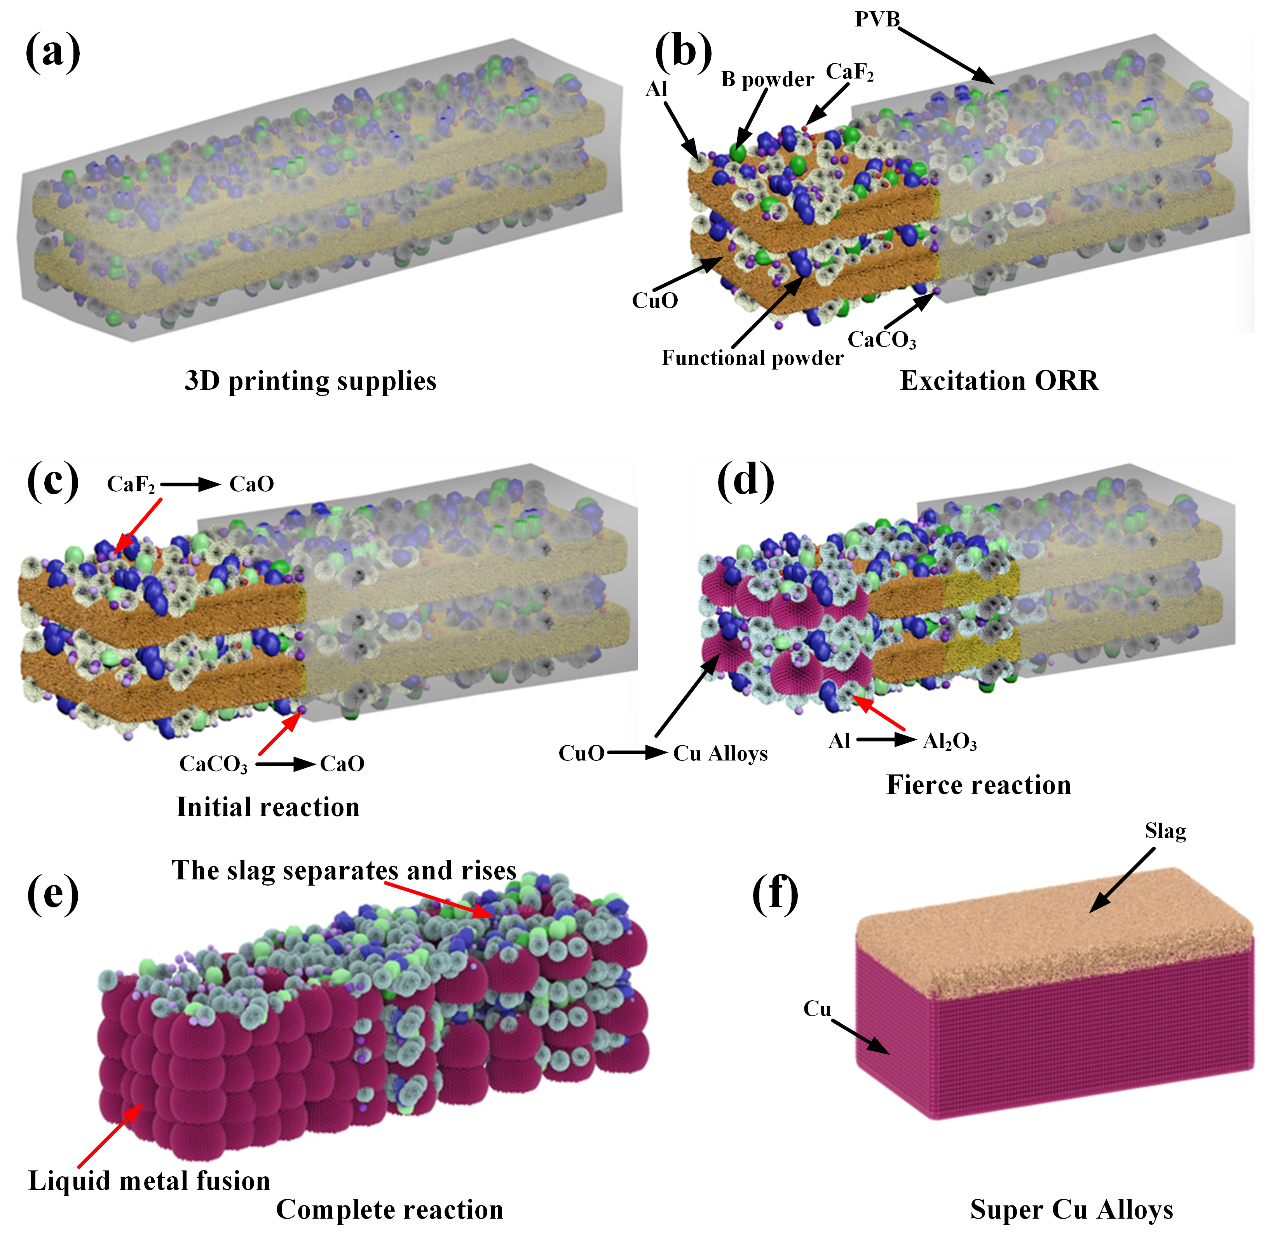


Supplementary Data 9. Reaction mechanism diagram of 3DPS. (a) 3DPS, (b) ORR excited after energizing ignition, (c) ORR initial reaction, (d) ORR carried out to a degree of intensity, (e) 3DPS completely consumed, (f) Super Cu alloy formed after cooling and solidification


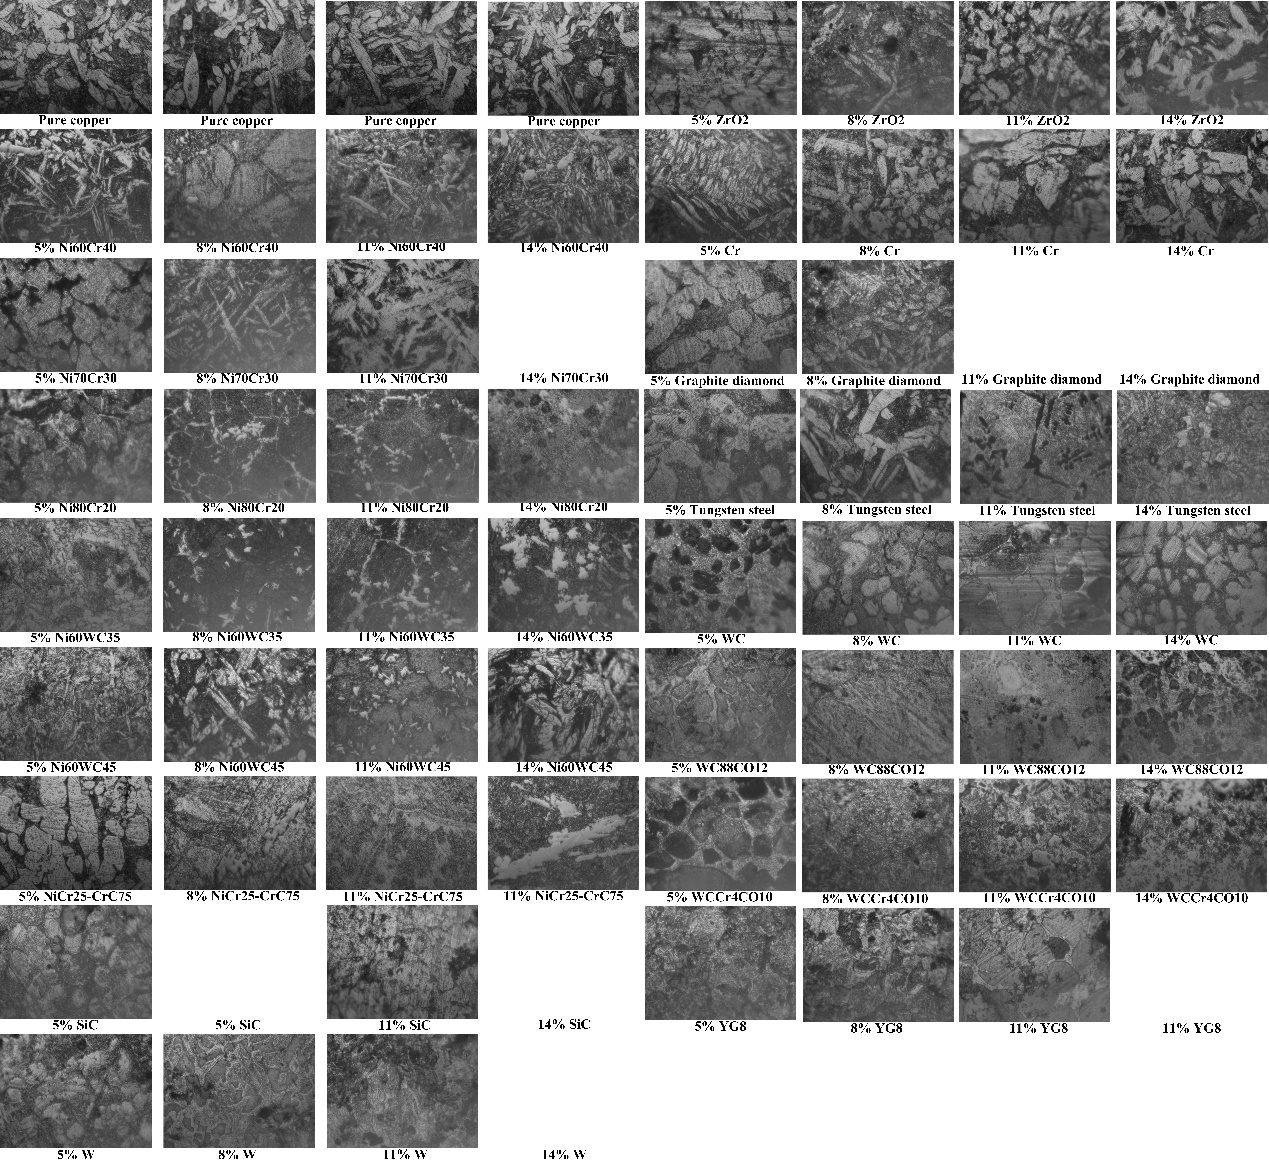


Supplementary Data 10. Microstructure of superalloys prepared by functional powders of different proportions


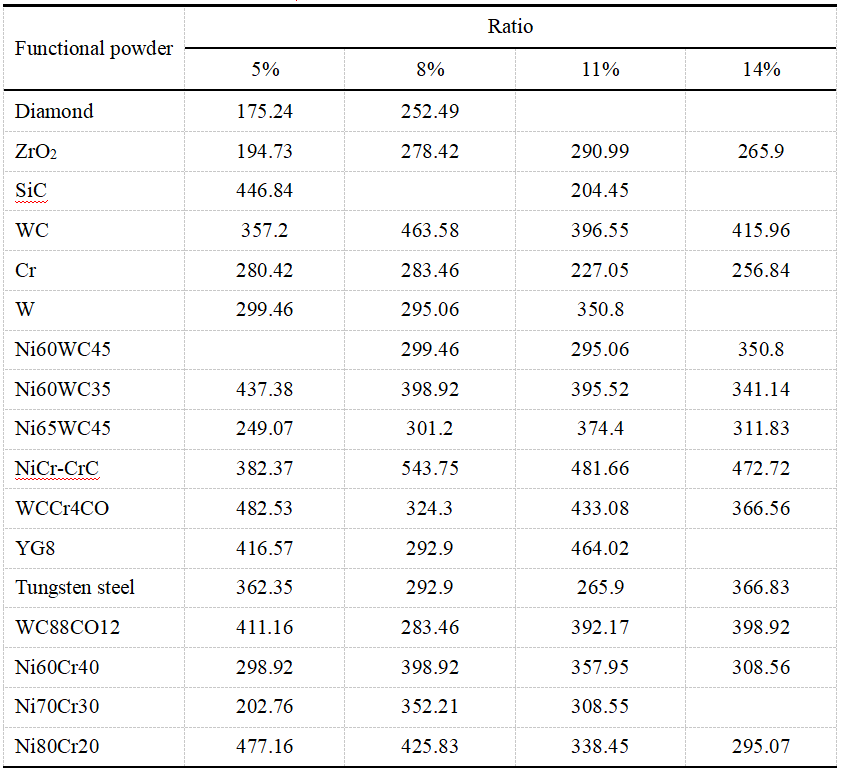


Supplementary Data 11. Microhardness of various functional powders at different proportions


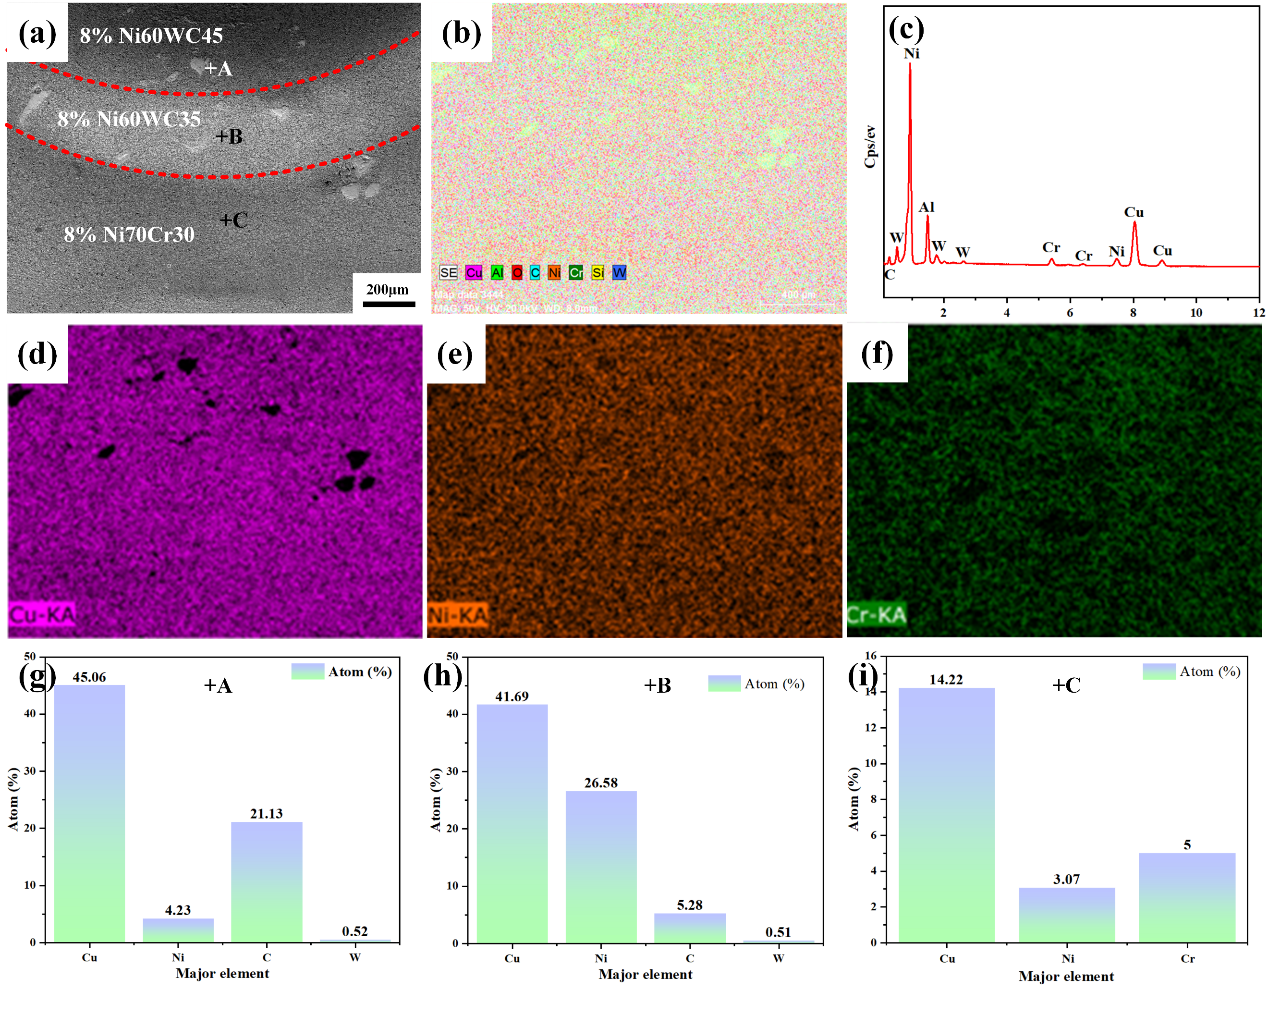


Fig. 12. Scanning data of Ni60WC45/Ni60WC35/Ni70Cr3: (a) three-layer gradient distribution structure, (b) scanning total spectrum, (c) energy spectrum, (d) Cu, (e) Ni, (f) Cr, (g) major atom share at point A, (h) major atom share at point B, (i) major atom share at point C.
